# Supplementary material for: RETRACTED ARTICLE: DNA barcoding detects contamination and substitution in North American herbal products
Source: Springer Nature journal article supplement (doi:10.1186/1741-7015-11-222), 2013-10-11
Supplement: 12916_2013_1106_MOESM1_ESM.pdf [file 12916_2013_1106_MOESM1_ESM.pdf]

**Supplemental Table 1.** Standard reference material SRM herbal barcode library BOLD accession numbers.

| S.No | Species name                      | Bold Accession Numbers |             |
|------|-----------------------------------|------------------------|-------------|
|      |                                   | <i>rbcL</i>            | <i>ITS</i>  |
| 1    | <i>Apios americana</i>            | HIMS002-12             | HIMS002-12  |
| 2    | <i>Baptisia australis</i>         | HIMS005-12             | HIMS005-12  |
| 3    | <i>Genista tinctoria</i>          | HIMS011-12             | HIMS011-12  |
| 4    | <i>Gleditsia triacanthos</i>      | HIMS013-12             | HIMS013-12  |
| 5    | <i>Lupinus perennis</i>           | HIMS022-12             | HIMS022-12  |
| 6    | <i>Lupinus polyphyllus</i>        | HIMS030-12             | HIMS030-12  |
| 7    | <i>Thermopsis rhombifolia</i>     | HIMS035-12             | HIMS035-12  |
| 8    | <i>Castanea dentata</i>           | HIMS053-12             | HIMS053-12  |
| 9    | <i>Catalpa ovata</i>              | HIMS067-12             | HIMS067-12  |
| 10   | <i>Silphium integrifolium</i>     | HIMS1026-12            | HIMS1026-12 |
| 11   | <i>Symphyotrichum lanceolatum</i> | HIMS1039-12            | HIMS1039-12 |
| 12   | <i>Thladiantha dubia</i>          | HIMS1051-12            | HIMS1051-12 |
| 13   | <i>Silphium laciniatum</i>        | HIMS1082-12            | HIMS1082-12 |
| 14   | <i>Solidago squarrosa</i>         | HIMS1106-12            | HIMS1106-12 |
| 15   | <i>Tanacetum parthenium</i>       | HIMS1116-12            | HIMS1116-12 |
| 16   | <i>Solidago uliginosa</i>         | HIMS1125-12            | HIMS1125-12 |
| 17   | <i>Amaranthus hybridus</i>        | HIMS1145-12            | HIMS1145-12 |
| 18   | <i>Atriplex rosea</i>             | HIMS1153-12            | HIMS1153-12 |
| 19   | <i>Chenopodium bonus-henricus</i> | HIMS1161-12            | HIMS1161-12 |
| 20   | <i>Cycloloma atriplicifolium</i>  | HIMS1165-12            | HIMS1165-12 |
| 21   | <i>Angelica atropurpurea</i>      | HIMS1300-12            | HIMS1300-12 |
| 22   | <i>Anthriscus sylvestris</i>      | HIMS1307-12            | HIMS1307-12 |
| 23   | <i>Chaerophyllum procumbens</i>   | HIMS1308-12            | HIMS1308-12 |
| 24   | <i>Conioselinum chinense</i>      | HIMS1310-12            | HIMS1310-12 |
| 25   | <i>Conium maculatum</i>           | HIMS1312-12            | HIMS1312-12 |
| 26   | <i>Coriandrum sativum</i>         | HIMS1315-12            | HIMS1315-12 |
| 27   | <i>Foeniculum vulgare</i>         | HIMS1320-12            | HIMS1320-12 |
| 28   | <i>Levisticum officinale</i>      | HIMS1330-12            | HIMS1330-12 |
| 29   | <i>Trifolium hybridum</i>         | HIMS1331-12            | HIMS1331-12 |
| 30   | <i>Phaseolus coccineus</i>        | HIMS1335-12            | HIMS1335-12 |
| 31   | <i>Desmodium paniculatum</i>      | HIMS1337-12            | HIMS1337-12 |
| 32   | <i>Chrysanthemum coccineum</i>    | HIMS1348-12            | HIMS1348-12 |
| 33   | <i>Cirsium discolor</i>           | HIMS1351-12            | HIMS1351-12 |
| 34   | <i>Cosmos bipinnatus</i>          | HIMS1368-12            | HIMS1368-12 |
| 35   | <i>Eupatorium serotinum</i>       | HIMS1395-12            | HIMS1395-12 |
| 36   | <i>Helianthus annuus</i>          | HIMS1404-12            | HIMS1404-12 |
| 37   | <i>Helianthus nuttallii</i>       | HIMS1419-12            | HIMS1419-12 |
| 38   | <i>Helianthus mollis</i>          | HIMS1420-12            | HIMS1420-12 |
| 39   | <i>Ligustrum ovalifolium</i>      | HIMS143-12             | HIMS143-12  |
| 40   | <i>Chimaphila maculata</i>        | HIMS1530-12            | HIMS1530-12 |

|    |                                |             |             |
|----|--------------------------------|-------------|-------------|
| 41 | <i>Frasera caroliniensis</i>   | HIMS1656-12 | HIMS1656-12 |
| 42 | <i>Morus rubra</i>             | HIMS1668-12 | HIMS1668-12 |
| 43 | <i>Gentianopsis crinita</i>    | HIMS1669-12 | HIMS1669-12 |
| 44 | <i>Sedum album</i>             | HIMS1692-12 | HIMS1692-12 |
| 45 | <i>Galium concinnum</i>        | HIMS1746-12 | HIMS1746-12 |
| 46 | <i>Sabatia angularis</i>       | HIMS1848-12 | HIMS1848-12 |
| 47 | <i>Maclura pomifera</i>        | HIMS1873-12 | HIMS1873-12 |
| 48 | <i>Centaurium erythraea</i>    | HIMS1878-12 | HIMS1878-12 |
| 49 | <i>Plantago major</i>          | HIMS2087-12 | HIMS2087-12 |
| 50 | <i>Trifolium pratense</i>      | HIMS2089-12 | HIMS2089-12 |
| 51 | <i>Lathyrus pratensis</i>      | HIMS2120-12 | HIMS2120-12 |
| 52 | <i>Trillium cernuum</i>        | HIMS2173-12 | HIMS2173-12 |
| 53 | <i>Magnolia acuminata</i>      | HIMS2182-12 | HIMS2182-12 |
| 54 | <i>Taraxacum officinale</i>    | HIMS2199-12 | HIMS2199-12 |
| 55 | <i>Oenothera biennis</i>       | HIMS2216-12 | HIMS2216-12 |
| 56 | <i>Stellaria media</i>         | HIMS2236-12 | HIMS2236-12 |
| 57 | <i>Vicia cracca</i>            | HIMS2237-12 | HIMS2237-12 |
| 58 | <i>Tragopogon pratensis</i>    | HIMS2243-12 | HIMS2243-12 |
| 59 | <i>Rumex crispus</i>           | HIMS2246-12 | HIMS2246-12 |
| 60 | <i>Medicago lupulina</i>       | HIMS2250-12 | HIMS2250-12 |
| 61 | <i>Amaranthus retroflexus</i>  | HIMS2254-12 | HIMS2254-12 |
| 62 | <i>Amaranthus albus</i>        | HIMS2255-12 | HIMS2255-12 |
| 63 | <i>Sinapis arvensis</i>        | HIMS2259-12 | HIMS2259-12 |
| 64 | <i>Campanula rapunculoides</i> | HIMS2262-12 | HIMS2262-12 |
| 65 | <i>Daucus carota</i>           | HIMS2264-12 | HIMS2264-12 |
| 66 | <i>Berteroa incana</i>         | HIMS2265-12 | HIMS2265-12 |
| 67 | <i>Potentilla norvegica</i>    | HIMS2266-12 | HIMS2266-12 |
| 68 | <i>Saponaria officinalis</i>   | HIMS2267-12 | HIMS2267-12 |
| 69 | <i>Chenopodium album</i>       | HIMS2268-12 | HIMS2268-12 |
| 70 | <i>Mertensia virginica</i>     | HIMS314-12  | HIMS314-12  |
| 71 | <i>Lepidium sativum</i>        | HIMS329-12  | HIMS329-12  |
| 72 | <i>Daphne mezereum</i>         | HIMS447-12  | HIMS447-12  |
| 73 | <i>Bellis perennis</i>         | HIMS527-12  | HIMS527-12  |
| 74 | <i>Cucumis sativus</i>         | HIMS774-12  | HIMS774-12  |
| 75 | <i>Cucurbita pepo</i>          | HIMS776-12  | HIMS776-12  |
| 76 | <i>Campanula trachelium</i>    | HIMS781-12  | HIMS781-12  |
| 77 | <i>Silphium perfoliatum</i>    | HIMS797-12  | HIMS797-12  |
| 78 | <i>Ratibida columnifera</i>    | HIMS798-12  | HIMS798-12  |
| 79 | <i>Lactuca sativa</i>          | HIMS801-12  | HIMS801-12  |
| 80 | <i>Sicyos angulatus</i>        | HIMS821-12  | HIMS821-12  |
| 81 | <i>Hieracium venosum</i>       | HIMS841-12  | HIMS841-12  |
| 82 | <i>Krigia biflora</i>          | HIMS855-12  | HIMS855-12  |
| 83 | <i>Rudbeckia laciniata</i>     | HIMS887-12  | HIMS887-12  |
| 84 | <i>Sambucus nigra</i>          | HIMS926-12  | HIMS926-12  |

|     |                                      |             |             |
|-----|--------------------------------------|-------------|-------------|
| 85  | <i>Tradescantia virginiana</i>       | HIMS953-12  | HIMS953-12  |
| 86  | <i>Symphytotrichum novae-angliae</i> | HIMS991-12  | HIMS991-12  |
| 87  | <i>Mikania scandens</i>              | HIMS993-12  | HIMS993-12  |
| 88  | <i>Acorus calamus</i>                | HIMS1241-12 | HIMS1241-12 |
| 89  | <i>Acorus calamus</i>                | HIMS1240-12 | HIMS1240-12 |
| 90  | <i>Amelanchier canadensis</i>        | HIMS1978-12 | HIMS1978-12 |
| 91  | <i>Amelanchier canadensis</i>        | HIMS1765-12 | HIMS1765-12 |
| 92  | <i>Anemone richardsonii</i>          | MKPCH308-09 | MKPCH308-09 |
| 93  | <i>Anemone richardsonii</i>          | MKPCH232-09 | MKPCH232-09 |
| 94  | <i>Apium graveolens</i>              | HIMS2202-12 | HIMS2202-12 |
| 95  | <i>Apium graveolens</i>              | HIMS2212-12 | HIMS2212-12 |
| 96  | <i>Arctostaphylos uva-ursi</i>       | PLKEN202-10 | BBYUK995-12 |
| 97  | <i>Arctostaphylos uva-ursi</i>       | PLALG099-08 | MKPCH171-09 |
| 98  | <i>Arctostaphylos uva-ursi</i>       | BPNP023-08  | MKPCH574-09 |
| 99  | <i>Artemisia douglasiana</i>         | HIMS520-12  | HIMS520-12  |
| 100 | <i>Artemisia douglasiana</i>         | HIMS519-12  | HIMS519-12  |
| 101 | <i>Echinacea purpurea</i>            | HIMS2204-12 | HIMS2204-12 |
| 102 | <i>Echinacea purpurea</i>            | HIMS1383-12 | WAT386-12   |
| 103 | <i>Echinacea purpurea</i>            | HIMS2205-12 | HIMS2204-12 |
| 104 | <i>Empetrum nigrum</i>               | MKPCH119-09 | MKPCH119-09 |
| 105 | <i>Empetrum nigrum</i>               | MKPCH151-09 | MKPCH151-09 |
| 106 | <i>Empetrum nigrum</i>               | MKPCH537-09 | MKPCH537-09 |
| 107 | <i>Erigenia bulbosa</i>              | HIMS1318-12 | HIMS1318-12 |
| 108 | <i>Erigenia bulbosa</i>              | HIMS1316-12 | HIMS1316-12 |
| 109 | <i>Erigenia bulbosa</i>              | HIMS1317-12 | HIMS1317-12 |
| 110 | <i>Ginkgo biloba</i>                 | HIMS2207-12 | HIMS2207-12 |
| 111 | <i>Ginkgo biloba</i>                 | HIMS2200-12 | HIMS2200-12 |
| 112 | <i>Heracleum maximum</i>             | HIMS1328-12 | HIMS1328-12 |
| 113 | <i>Heracleum maximum</i>             | HIMS1326-12 | HIMS1326-12 |
| 114 | <i>Hydrastis canadensis</i>          | HIMS1880-12 | HIMS1880-12 |
| 115 | <i>Juglans nigra</i>                 | HIMS2209-12 | HIMS2208-12 |
| 116 | <i>Juglans nigra</i>                 | HIMS2208-12 | HIMS2206-12 |
| 117 | <i>Menispermum canadense</i>         | HIMS1043-12 | HIMS1043-12 |
| 118 | <i>Menispermum canadense</i>         | HIMS1042-12 | HIMS1042-12 |
| 119 | <i>Menispermum canadense</i>         | HIMS937-12  | HIMS937-12  |
| 120 | <i>Myrica gale</i>                   | MKPCH316-09 | MKPCH316-09 |
| 121 | <i>Myrica gale</i>                   | MKPCH437-09 | MKPCH501-09 |
| 122 | <i>Ribes oxycanthoides</i>           | MKPCH116-09 | MKPCH116-09 |
| 123 | <i>Ribes oxycanthoides</i>           | MKPCH212-09 | MKPCH212-09 |
| 124 | <i>Ribes oxycanthoides</i>           | MKPCH234-09 | MKPCH234-09 |
| 125 | <i>Rudbeckia hirta</i>               | WAT102-12   | WAT102-12   |
| 126 | <i>Rudbeckia hirta</i>               | HIMS2218-12 | HIMS2218-12 |
