# Supplementary material for: RETRACTED ARTICLE: DNA barcoding detects contamination and substitution in North American herbal products
Source: Springer Nature journal article supplement (doi:10.1186/1741-7015-11-222), 2013-10-11
Supplement: 12916_2013_1106_MOESM2_ESM.pdf [file 12916_2013_1106_MOESM2_ESM.pdf]

**Table 2.** List of Genbank Accession Numbers

| <b>S.No</b> | <b>Species Name</b>                | <b>Accession Numbers</b> |
|-------------|------------------------------------|--------------------------|
| 1           | <i>Apios americana</i>             | KF613005                 |
| 2           | <i>Baptisia australis</i>          | KF613006                 |
| 3           | <i>Genista tinctoria</i>           | KF613007                 |
| 4           | <i>Gleditsia tricanthos</i>        | KF613008                 |
| 5           | <i>Lupinus perennis</i>            | KF613009                 |
| 6           | <i>Lupinus polyphyllus</i>         | KF613010                 |
| 7           | <i>Thermopsis rhombifolia</i>      | KF613011                 |
| 8           | <i>Castanea dentata</i>            | KF613012                 |
| 9           | <i>Catalpa ovata</i>               | KF613013                 |
| 10          | <i>Silphium integrifolium</i>      | KF613014                 |
| 11          | <i>Symphytotrichum lanceolatum</i> | KF613015                 |
| 12          | <i>Thladiantha dubia</i>           | KF613016                 |
| 13          | <i>Silphium laciniatum</i>         | KF613017                 |
| 14          | <i>Solidago squarrosa</i>          | KF613018                 |
| 15          | <i>Tanacetum parthenium</i>        | KF613019                 |
| 16          | <i>Solidago uliginosa</i>          | KF613020                 |
| 17          | <i>Amaranthus hybridus</i>         | KF613021                 |
| 18          | <i>Atriplex rosea</i>              | KF613022                 |
| 19          | <i>Chenopodium bonus-henricus</i>  | KF613023                 |
| 20          | <i>Cycloloma atriplicifolium</i>   | KF613024                 |
| 21          | <i>Angelica atropurpurea</i>       | KF613025                 |
| 22          | <i>Anthriscus sylvestris</i>       | KF613026                 |
| 23          | <i>Chaerophyllum procumbens</i>    | KF613027                 |
| 24          | <i>Conioselinum chinense</i>       | KF613028                 |
| 25          | <i>Conium maculatum</i>            | KF613029                 |
| 26          | <i>Coriandrum sativum</i>          | KF613030                 |
| 27          | <i>Foeniculum vulgare</i>          | KF613031                 |
| 28          | <i>Levisticum officinale</i>       | KF613032                 |
| 29          | <i>Trifolium hybridum</i>          | KF613033                 |
| 30          | <i>Phaseolus coccineus</i>         | KF613034                 |
| 31          | <i>Desmodium paniculatum</i>       | KF613035                 |
| 32          | <i>Chrysanthemum coccineum</i>     | KF613036                 |
| 33          | <i>Cirsium discolor</i>            | KF613037                 |
| 34          | <i>Cosmos bipinnatus</i>           | KF613038                 |
| 35          | <i>Eupatorium serotinum</i>        | KF613039                 |
| 36          | <i>Helianthus annuus</i>           | KF613040                 |
| 37          | <i>Helianthus nuttallii</i>        | KF613041                 |
| 38          | <i>Helianthus mollis</i>           | KF613042                 |

|    |                                |          |
|----|--------------------------------|----------|
| 39 | <i>Ligustrum ovalifolium</i>   | KF613043 |
| 40 | <i>Chimaphila maculata</i>     | KF613044 |
| 41 | <i>Frasera caroliniensis</i>   | KF613045 |
| 42 | <i>Morus rubra</i>             | KF613046 |
| 43 | <i>Gentianopsis crinita</i>    | KF613047 |
| 44 | <i>Sedum album</i>             | KF613048 |
| 45 | <i>Galium concinnum</i>        | KF613049 |
| 46 | <i>Sabatia angularis</i>       | KF613050 |
| 47 | <i>Maclura pomifera</i>        | KF613051 |
| 48 | <i>Centaurium erythraea</i>    | KF613052 |
| 49 | <i>Plantago major</i>          | KF613053 |
| 50 | <i>Trifolium pratense</i>      | KF613054 |
| 51 | <i>Lathyrus pratensis</i>      | KF613055 |
| 52 | <i>Trillium cernuum</i>        | KF613056 |
| 53 | <i>Magnolia acuminata</i>      | KF613057 |
| 54 | <i>Taraxacum officinale</i>    | KF613058 |
| 55 | <i>Oenothera biennis</i>       | KF613059 |
| 56 | <i>Stellaria media</i>         | KF613060 |
| 57 | <i>Vicia cracca</i>            | KF613061 |
| 58 | <i>Tragopogon pratensis</i>    | KF613062 |
| 59 | <i>Rumex crispus</i>           | KF613063 |
| 60 | <i>Medicago lupulina</i>       | KF613064 |
| 61 | <i>Amaranthus retroflexus</i>  | KF613065 |
| 62 | <i>Amaranthus albus</i>        | KF613066 |
| 63 | <i>Sinapis arvensis</i>        | KF613067 |
| 64 | <i>Campanula rapunculoides</i> | KF613068 |
| 65 | <i>Daucus carota</i>           | KF613069 |
| 66 | <i>Berteroa incana</i>         | KF613070 |
| 67 | <i>Potentilla norvegica</i>    | KF613071 |
| 68 | <i>Saponaria officinalis</i>   | KF613072 |
| 69 | <i>Chenopodium album</i>       | KF613073 |
| 70 | <i>Mertensia virginica</i>     | KF613074 |
| 71 | <i>Lepidium sativum</i>        | KF613075 |
| 72 | <i>Daphne mezereum</i>         | KF613076 |
| 73 | <i>Bellis perennis</i>         | KF613077 |
| 74 | <i>Cucumis sativus</i>         | KF613078 |
| 75 | <i>Cucurbita pepo</i>          | KF613079 |
| 76 | <i>Campanula trachelium</i>    | KF613080 |
| 77 | <i>Silphium perfoliatum</i>    | KF613081 |
| 78 | <i>Ratibida columnifera</i>    | KF613082 |
| 79 | <i>Lactuca sativa</i>          | KF613083 |
| 80 | <i>Sicyos angulatus</i>        | KF613084 |

|     |                             |          |
|-----|-----------------------------|----------|
| 81  | Hieracium venosum           | KF613085 |
| 82  | Krigia biflora              | KF613086 |
| 83  | Rudbeckia laciniata         | KF613087 |
| 84  | Sambucus nigra              | KF613088 |
| 85  | Tradescantia virginiana     | KF613089 |
| 86  | Symphotrichum novae-angliae | KF613090 |
| 87  | Mikania scandens            | KF613091 |
| 88  | Acorus calamus              | KF613092 |
| 89  | Acorus calamus              | KF613093 |
| 90  | Amelanchier canadensis      | KF613094 |
| 91  | Amelanchier canadensis      | KF613095 |
| 92  | Apium graveolens            | KF613096 |
| 93  | Apium graveolens            | KF613097 |
| 94  | Arctostaphylos uva-ursi     | KF613098 |
| 95  | Arctostaphylos uva-ursi     | KF613099 |
| 96  | Arctostaphylos uva-ursi     | KF613100 |
| 97  | Artemisia douglasiana       | KF613101 |
| 98  | Artemisia douglasiana       | KF613102 |
| 99  | Echinacea purpurea          | KF613103 |
| 100 | Echinacea purpurea          | KF613104 |
| 101 | Echinacea purpurea          | KF613105 |
| 102 | Erigenia bulbosa            | KF613106 |
| 103 | Erigenia bulbosa            | KF613107 |
| 104 | Erigenia bulbosa            | KF613108 |
| 105 | Ginkgo biloba               | KF613109 |
| 106 | Ginkgo biloba               | KF613110 |
| 107 | Heracleum maximum           | KF613111 |
| 108 | Heracleum maximum           | KF613112 |
| 109 | Hydrastis canadensis        | KF613113 |
| 110 | Juglans nigra               | KF613114 |
| 111 | Juglans nigra               | KF613115 |
| 112 | Menispermum canadense       | KF613116 |
| 113 | Menispermum canadense       | KF613117 |
| 114 | Menispermum canadense       | KF613118 |
| 115 | Rudbeckia hirta             | KF613119 |
| 116 | Rudbeckia hirta             | KF613120 |
| 117 | Anemone richardsonii        | JN965246 |
| 118 | Anemone richardsonii        | JN965247 |
| 119 | Empetrum nigrum             | JN965513 |
| 120 | Empetrum nigrum             | JN965514 |
| 121 | Empetrum nigrum             | JN965515 |
| 122 | Myrica gale                 | JN965684 |

|     |                            |          |
|-----|----------------------------|----------|
| 123 | <i>Myrica gale</i>         | JN965685 |
| 124 | <i>Ribes oxycanthoides</i> | JN965815 |
| 125 | <i>Ribes oxycanthoides</i> | JN965816 |
| 126 | <i>Ribes oxycanthoides</i> | JN965817 |
