# Supplementary material for: RETRACTED ARTICLE: DNA barcoding detects contamination and substitution in North American herbal products
Source: Springer Nature journal article supplement (doi:10.1186/1741-7015-11-222), 2013-10-11

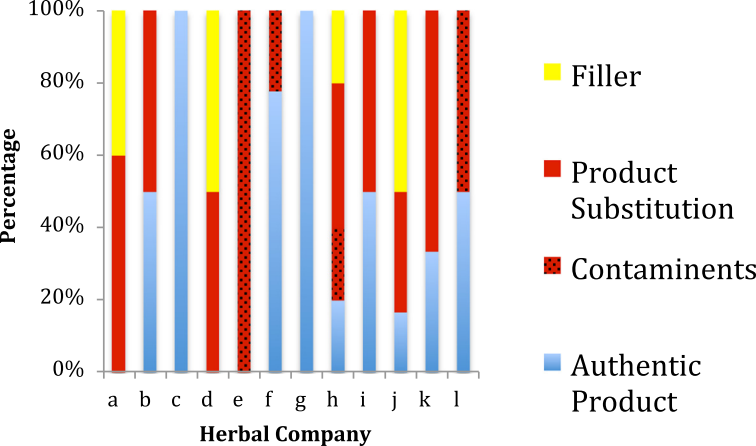

Supplement: 12916_2013_1106_MOESM5_ESM.pdf [file 12916_2013_1106_MOESM5_ESM.pdf]
